# Supplementary material for: Cell-signalling dynamics in time and space
Source: Springer Nature journal article supplement (doi:10.1038/nrm1838), 2006-02-15

**Supplementary information S3 (figure) | Sixteen additional feedback designs that give rise to relaxation oscillations**

Although the equation structure is similar to equations present in supplementary information S2 (box), these designs usually require some degree of cooperativity of feedback regulations. Exploration of possible rate expression and parameter ranges (bifurcation diagrams) that bring about relaxation oscillations for these feedback designs is an instructive exercise for Systems Biology students.

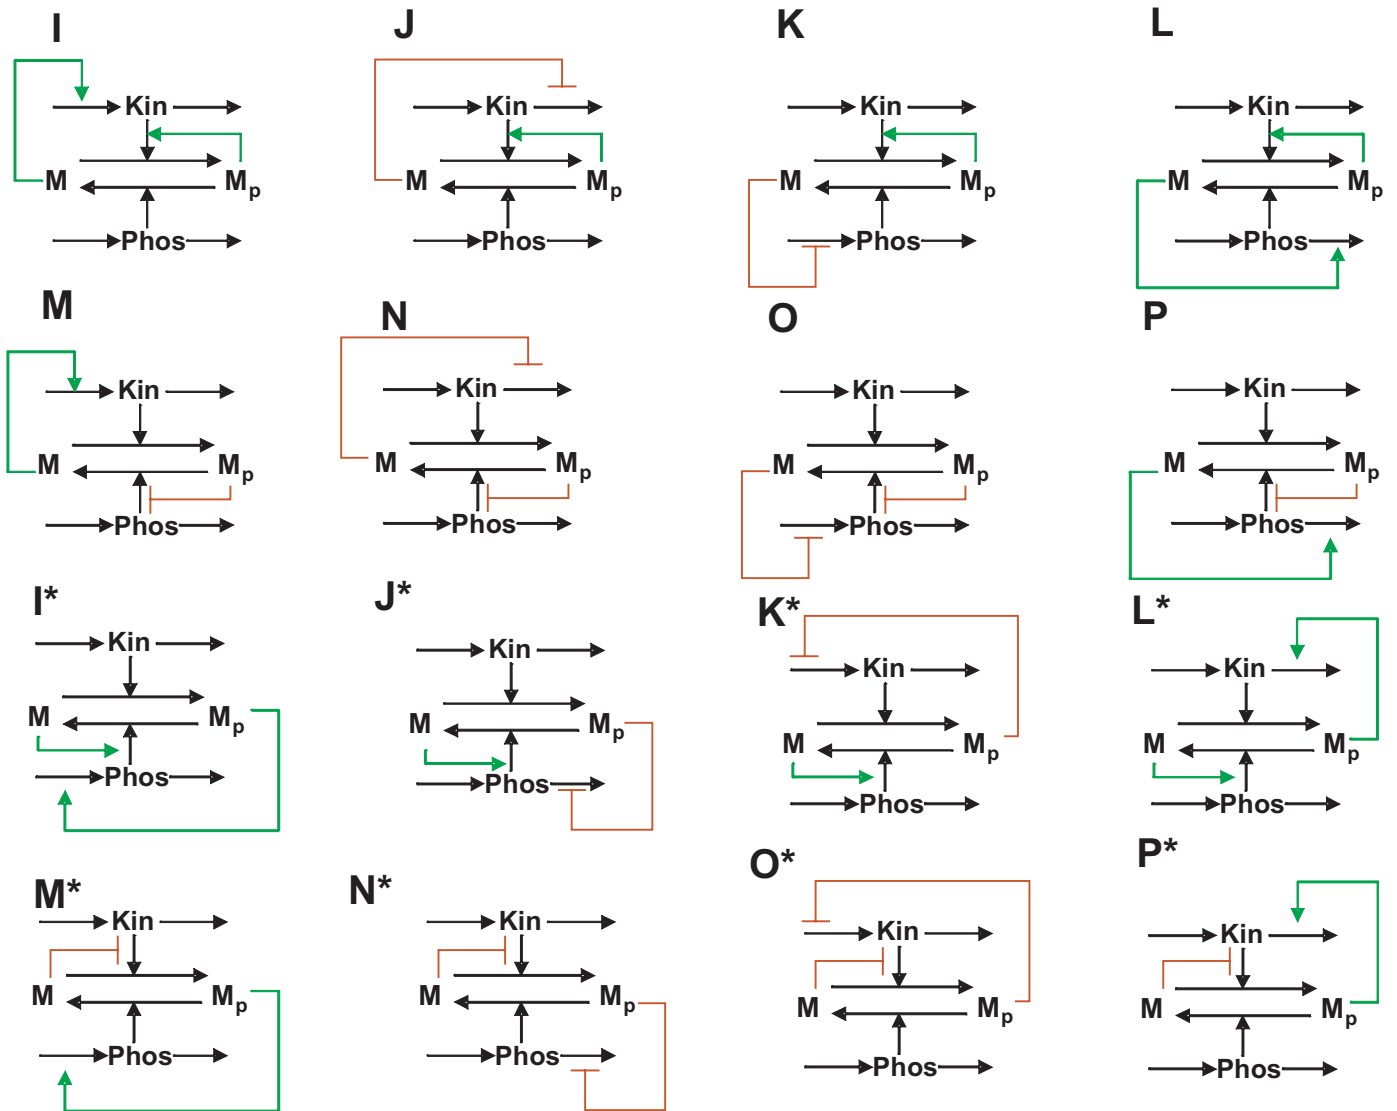

Supplement: 41580_2006_BFnrm1838_MOESM3_ESM.pdf [file 41580_2006_BFnrm1838_MOESM3_ESM.pdf]
