# Supplementary material for: Cell-signalling dynamics in time and space
Source: Springer Nature journal article supplement (doi:10.1038/nrm1838), 2006-02-15
Supplement: 41580_2006_BFnrm1838_MOESM4_ESM.pdf [file 41580_2006_BFnrm1838_MOESM4_ESM.pdf]

**Supplementary information S4 (table) | Designations of molecules in figure panel a, BOX 1**

| <b>Designation</b> | <b>Name</b>                                                                                               |
|--------------------|-----------------------------------------------------------------------------------------------------------|
| R                  | EGFR monomer                                                                                              |
| R <sub>a</sub>     | EGFR-EGF monomer                                                                                          |
| R <sub>2</sub>     | (R <sub>a</sub> ) <sub>2</sub> , EGFR-EGF dimer                                                           |
| RP                 | Tyrosine phosphorylated EGFR-EGF dimer                                                                    |
| GAP                | RasGAP, Ras GTPase activating protein                                                                     |
| GAPP               | Tyrosine phosphorylated RasGAP, RasGAPP                                                                   |
| R-GAP              | Complex of tyrosine phosphorylated EGFR and RasGAP, RP-RasGAP                                             |
| R-GAPP             | Complex of tyrosine phosphorylated EGFR and tyrosine phosphorylated RasGAP, RP-RasGAPP                    |
| R-PL               | Complex of tyrosine phosphorylated EGFR and PLC $\gamma$ , RP-PLC $\gamma$                                |
| R-PLP              | RP-PLC $\gamma$ P                                                                                         |
| R-G                | Complex of tyrosine phosphorylated EGFR and Grb2, RP-Grb2                                                 |
| R-G-S              | Complex of tyrosine phosphorylated EGFR and Grb2-SOS, RP-Grb2-SOS                                         |
| G-S                | Complex of Grb2 and SOS, Grb2-SOS                                                                         |
| R-Sh               | Complex of tyrosine phosphorylated EGFR and Shc, RP-Shc                                                   |
| R-ShP              | RP-ShcP                                                                                                   |
| ShP                | Tyrosine phosphorylated Shc, ShcP                                                                         |
| R-Sh-G             | RP-ShcP-Grb2                                                                                              |
| Sh-G               | ShcP-Grb2                                                                                                 |
| R-Sh-G-S           | RP-ShcP-Grb2-SOS                                                                                          |
| Sh-G-S             | ShcP-Grb2-SOS                                                                                             |
| RasD               | RasGDP                                                                                                    |
| RasT               | RasGTP                                                                                                    |
| R-G-S-rD           | RP-Grb2-SOS-RasGDP                                                                                        |
| R-G-S-r            | RP-Grb2-SOS-Ras                                                                                           |
| R-G-S-rT           | RP-Grb2-SOS-RasGTP                                                                                        |
| R-GP               | Complexes of tyrosine phosphorylated EGFR with RasGAP or tyrosine phosphorylated RasGAP, R-GAP and R-GAPP |
| R-GP-rT            | RP-GP-RasGTP                                                                                              |
| R-Sh-G-S-rD        | RP-ShcP-Grb2-SOS-RasGDP                                                                                   |
| R-Sh-G-S-r         | RP-ShcP-Grb2-SOS-Ras                                                                                      |
| R-Sh-G-S-rT        | RP-ShcP-Grb2-SOS-RasGTP                                                                                   |
