# Supplementary material for: Cell-signalling dynamics in time and space
Source: Springer Nature journal article supplement (doi:10.1038/nrm1838), 2006-02-15

**Supplementary information S5 (figure) | Stationary profile of a protein that is phosphorylated by a kinase localized to a supra-molecular structure and dephosphorylated by a homogeneously distributed phosphatase**

The relative phosphorylated fraction  $c_p(s)/c_p(d)$  declines with the distance  $d$  from the kinase that is confined to the spherical structural element of radius  $s$ . The steepness of the gradient (reciprocal of the characteristic length) is determined by the parameter  $\alpha$  ( $\alpha^2 = k_p/D$  is the ratio of the phosphatase activity  $k_p$  and the protein diffusivity  $D$ ).

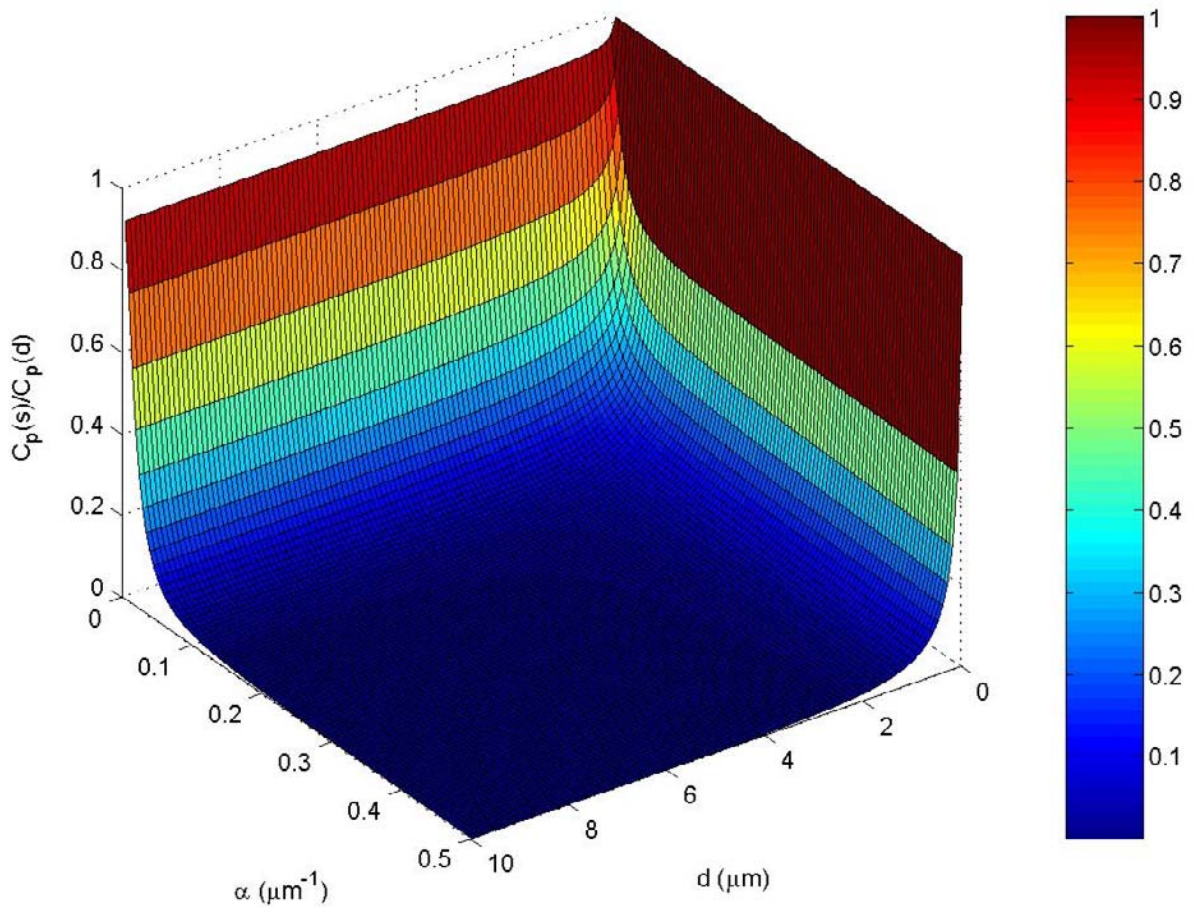

Supplement: 41580_2006_BFnrm1838_MOESM5_ESM.pdf [file 41580_2006_BFnrm1838_MOESM5_ESM.pdf]
