# Supplementary material for: Cell-signalling dynamics in time and space
Source: Springer Nature journal article supplement (doi:10.1038/nrm1838), 2006-02-15
Supplement: 41580_2006_BFnrm1838_MOESM6_ESM.pdf [file 41580_2006_BFnrm1838_MOESM6_ESM.pdf]

**Supplementary information S6 (table) | Kinetic description of a three-kinase cascade.**

The spatio-temporal dynamics is described by the reaction-diffusion system (equation 1 in BOX 4 of the main text). Both phosphorylated and unphosphorylated forms of kinases  $M_1$ ,  $M_2$  and  $M_3$  diffuse in the cytoplasm. The cell radius  $L = 10 \mu\text{m}$ , the diffusion coefficient  $D$  is assumed to be equal for all kinase forms,  $D = 5 \mu\text{m}^2/\text{sec}$ . Total concentrations of the unphosphorylated ( $M_i$ ) form and phosphorylated form ( $M_iP$ ) are assumed constant on the time scale considered,  $M_i + M_iP = M_{tot}$ . Equation 1 can be solved for dimensionless variables  $M_iP/M_{tot}$ , therefore, in the table the Michaelis constants ( $K_{mi}$  and  $K_{mpi}$ ,  $i = 1,2,3$ ) and the maximal activities ( $V_{phos}^i$ ) are normalized by  $M_{tot}$ .

| Reaction                                            | Rate expression                                               | Kinetic constants                                                                  |
|-----------------------------------------------------|---------------------------------------------------------------|------------------------------------------------------------------------------------|
| Membrane kinase<br>$M_1 \rightarrow M_1P$           | $v_{kin}^{mem} = \frac{V_{kin}^{mem} M_1}{(K_{m1} + M_1)}$    | $V_{kin}^{mem} / M_{tot} = (7.5 L/3) \mu\text{m s}^{-1}$<br>$K_{m1}/M_{tot} = 0.5$ |
| Cytoplasmic phosphatase-1<br>$M_1P \rightarrow M_1$ | $v_{phos}^1 = \frac{V_{phos}^1 M_1P}{(K_{mp1} + M_1P)}$       | $V_{phos}^1 / M_{tot} = 3 \text{ s}^{-1}$<br>$K_{mp1}/M_{tot} = 0.7$               |
| Kinase $M_1P$<br>$M_2 \rightarrow M_2P$             | $v_{kin}^1 = \frac{k_2^{cat} M_1P \cdot M_2}{(K_{m2} + M_2)}$ | $k_2^{cat} = 9 \text{ s}^{-1}$<br>$K_{m2}/M_{tot} = 0.7$                           |
| Cytoplasmic phosphatase-2<br>$M_2P \rightarrow M_2$ | $v_{phos}^2 = V_{phos}^2 \frac{M_2P}{(K_{mp2} + M_2P)}$       | $V_{phos}^2 / M_{tot} = 3 \text{ s}^{-1}$<br>$K_{mp2}/M_{tot} = 0.7$               |
| Kinase $M_2P$<br>$M_3 \rightarrow M_3P$             | $v_{kin}^2 = \frac{k_3^{cat} M_2P \cdot M_3}{(K_{m3} + M_3)}$ | $k_3^{cat} = 9 \text{ s}^{-1}$<br>$K_{m3}/M_{tot} = 0.5$                           |
| Cytoplasmic phosphatase-3<br>$M_3P \rightarrow M_3$ | $v_{phos}^3 = V_{phos}^3 \frac{M_3P}{(K_{mp3} + M_3P)}$       | $V_{phos}^3 / M_{tot} = 3 \text{ s}^{-1}$<br>$K_{mp3}/M_{tot} = 0.7$               |

Steady-state spatial profiles shown in BOX 4 of the main text (see figure, panel A) are calculated using the reaction diffusion equations with the rate expressions and parameters given in supplementary information S6 (table).
