# Supplementary material for: Cell-signalling dynamics in time and space
Source: Springer Nature journal article supplement (doi:10.1038/nrm1838), 2006-02-15
Supplement: 41580_2006_BFnrm1838_MOESM7_ESM.pdf [file 41580_2006_BFnrm1838_MOESM7_ESM.pdf]

**Supplementary information S7 (figure) | Propagation of phospho-protein waves through kinase cascades**

Bistability in protein kinase/phosphatase cascades might give rise to travelling waves of phosphorylated kinase that transmit signals to distant targets<sup>1</sup>. This figure shows one-dimensional bifurcation diagram of the dependence of the active form  $M_3P$  on the activity of the membrane-bound kinase, and supplementary information S8 (table) provides the rate expressions and kinetic parameters for a bistable cytoplasmic cascade.

**References**

1. Kholodenko, B. N. Four-dimensional organization of protein kinase signaling cascades: the roles of diffusion, endocytosis and molecular motors. *J. Exp. Biol.* **206**, 2073–2082 (2003).

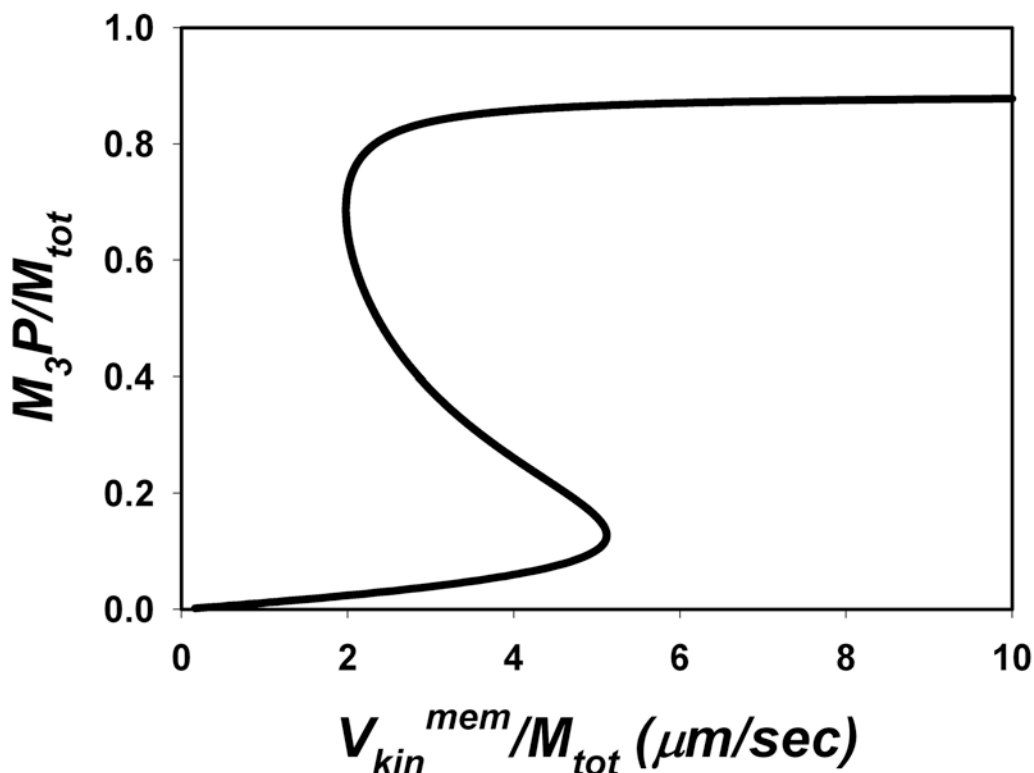

**Hysteresis and bistability in a three level phosphorylation cascade.** The dependence of the phosphorylation kinase fraction at the terminal level on the input activity of the membrane-bound kinase. The rate expressions and kinetic parameters are given in supplementary information S8 (table).
